# Supplementary material
Source: PubMed Central journal article supplement (PMC5443329)

Supplemental Data:

Supplemental Figure 1. UCSC Genome Browser screenshot demonstrating EXCAVATOR2 CNV prediction on chromosome X for 46,XX control females. No evidence of significant copy number changes (red, blue bars) was seen, consistent with no false positives for TS among control females.

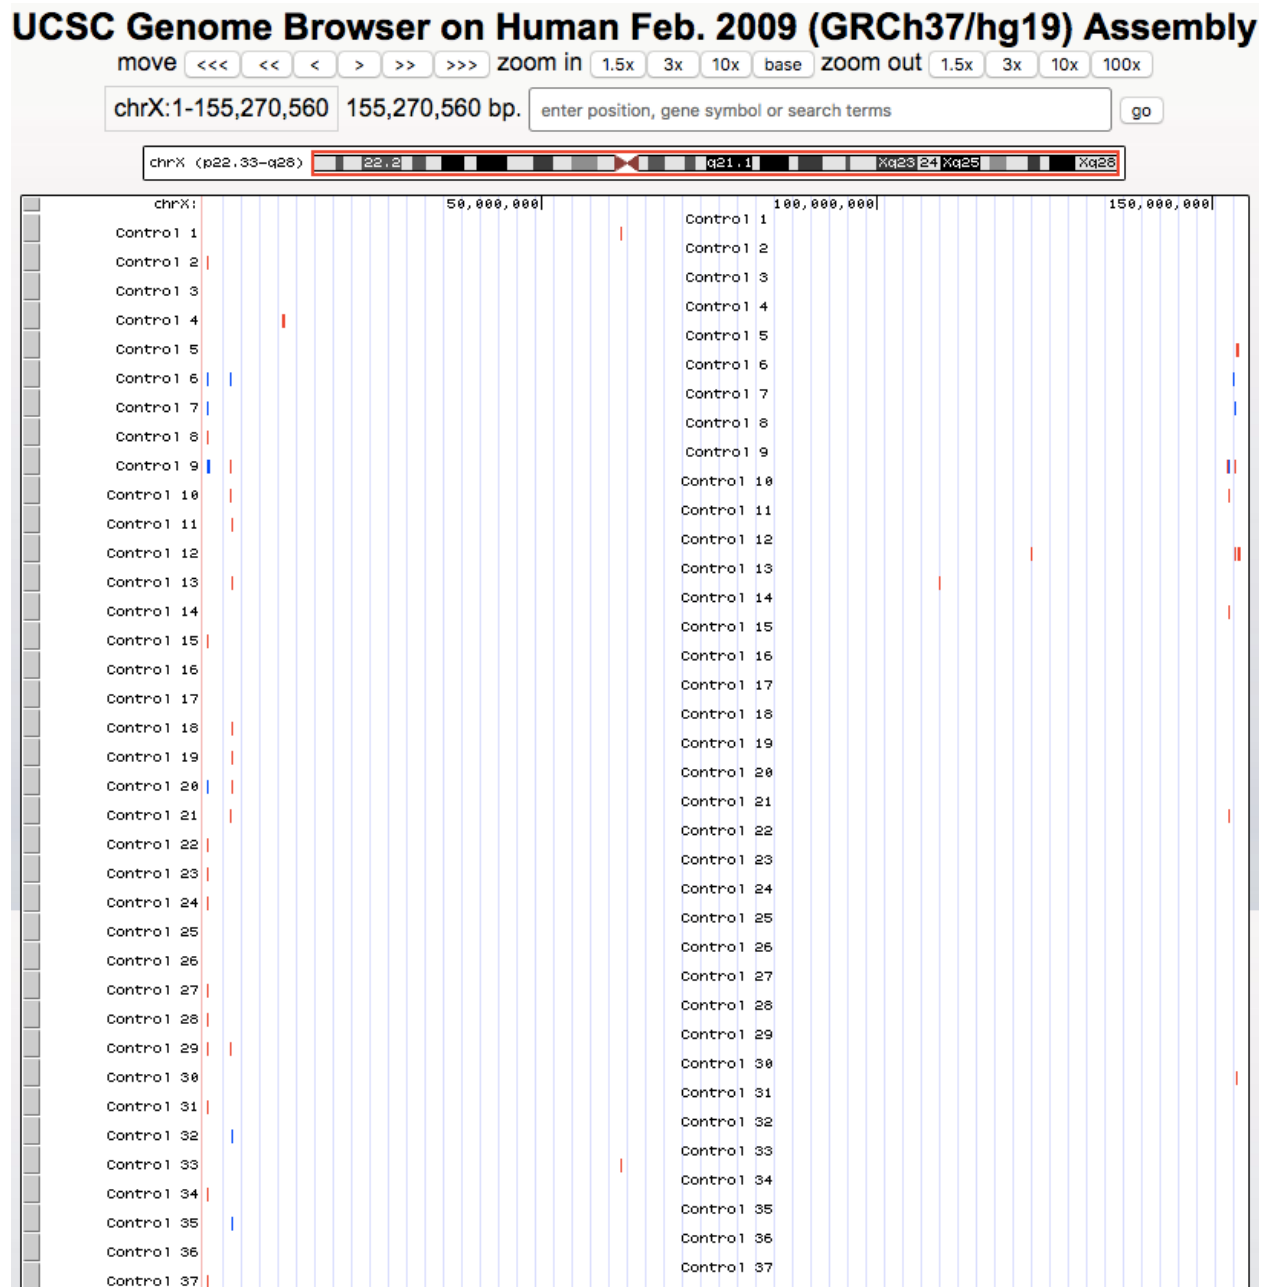

Supplemental Figure 2:

Log R ratio (LRR) plot for TS Patient 14 with previously unknown chromosome Y material, compared to 46,XY controls. Negative deviation of LRR (red line) from zero in this region (black arrows) suggests some degree of mosaicism.

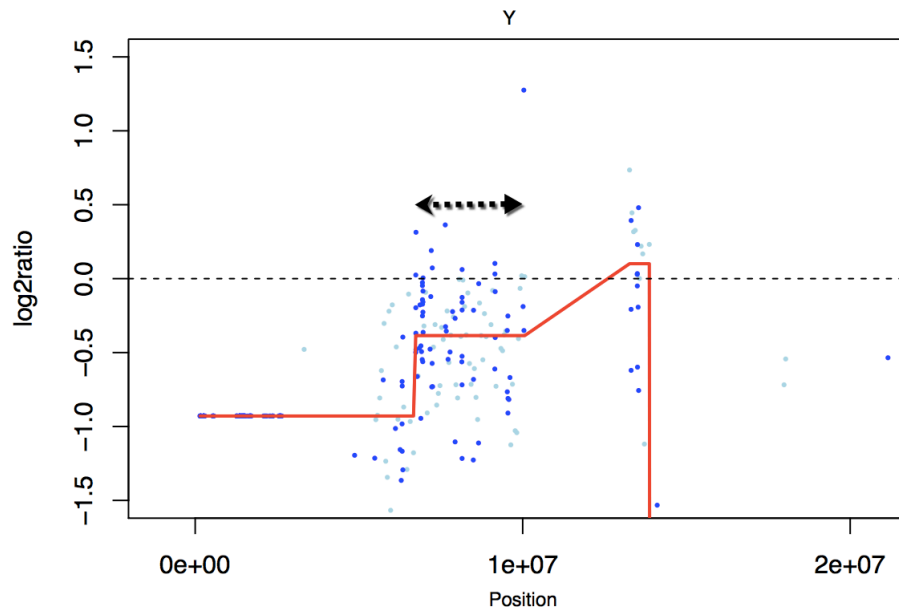

Supplement: jc.2016-3414.sm1.pdf [file jc.2016-3414.sm1.pdf]
